# Supplementary material for: Design and synthesis of a near infra-red luminescent hexanuclear Zn–Nd prism
Source: Royal Society of Chemistry journal article supplement (doi:10.1039/b518128c), 2006-01-01

## § Electronic supplementary information (ESI):

(1) *Experimental procedure* of H<sub>2</sub>L: This Schiff base ligand was synthesized with 5-bromo-2-hydroxy-3-methoxybenzaldehyde (4.62g, 0.02mol) and 1,3-diaminopropane (0.83 ml, 0.01mol) in ethanol (60 ml) according to well-established procedures.<sup>10</sup> Yield 3.52 g, 70 %. <sup>1</sup>H NMR (400 MHz, CD<sub>3</sub>OD): d (ppm) 2.022 (p, 2H), 3.673 (t, 4H), 3.784 (s, 6H), 7.099 (s, 2H), 7.200 (s, 2H), 8.517 (s, 2H).

(2) *Figure S1*. 2D-COSY spectrum of **1** in CD<sub>3</sub>OD.

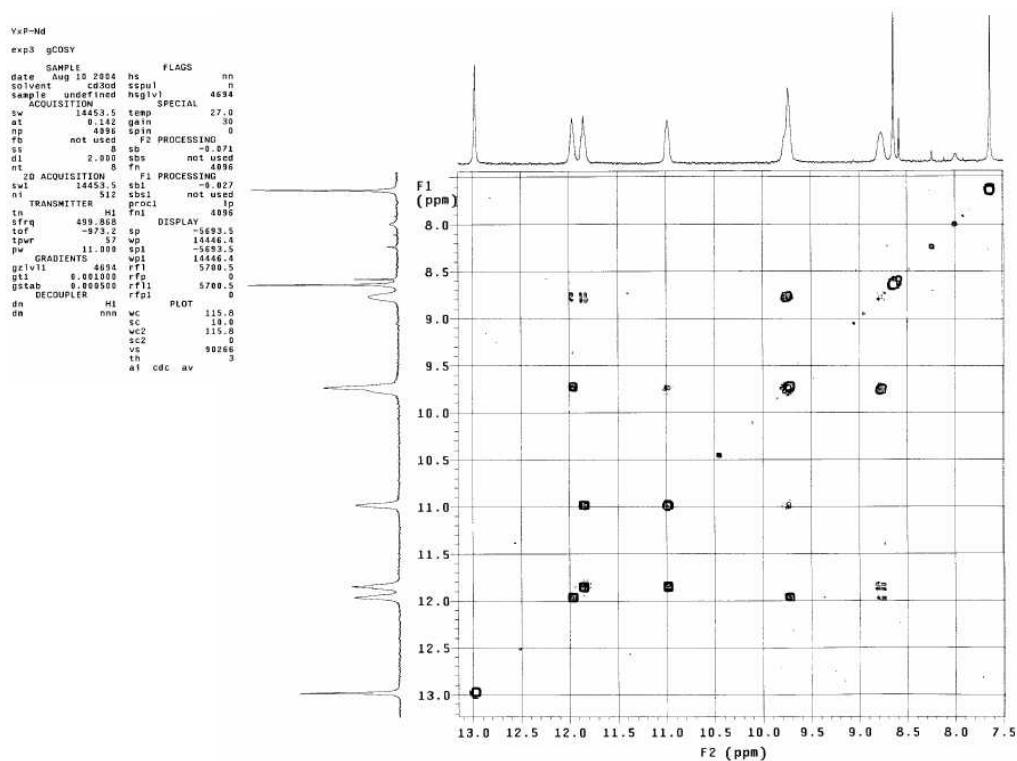

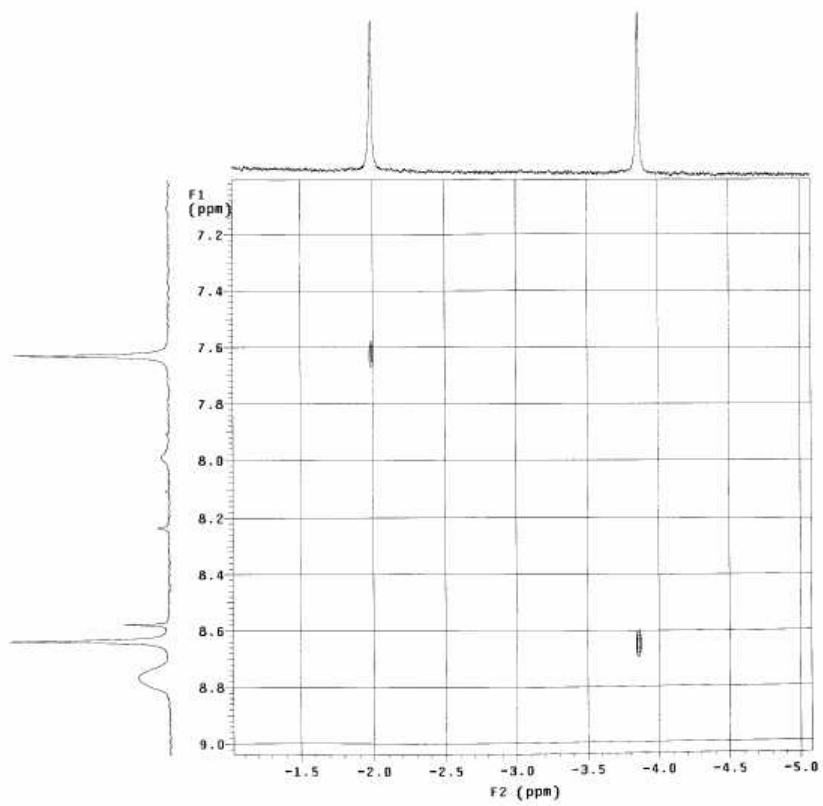

(3) *Figure S2*. Crystal structure of **2**: (Thermal ellipsoids are drawn at the 25 % probability level. Hydrogen atoms are omitted for clarity)

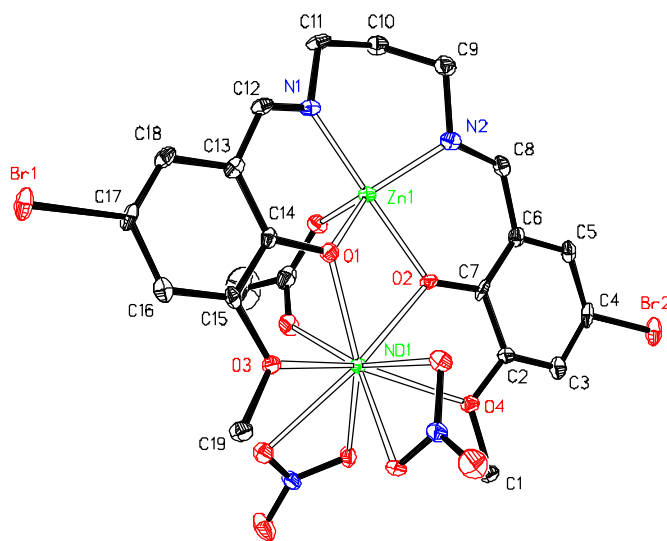

Supplement: b518128c.pdf [file b518128c.pdf]
